# Supplementary material for: Identification of Stem Rust Resistance Genes in Triticum Wheat Cultivars and Evaluation of Their Resistance to Puccinia graminis f. sp. tritici
Source: MDPI journal article supplement (doi:10.3390/agriculture14020198), 2024-01-26
Supplement: s1 [file s1]

Archive with 2 entries (2 files):
- Supplemental Table S1.pdf
- Supplemental Table S2.pdf
