# Supplementary material for: Identification of Stem Rust Resistance Genes in Triticum Wheat Cultivars and Evaluation of Their Resistance to Puccinia graminis f. sp. tritici
Source: MDPI journal article supplement (doi:10.3390/agriculture14020198), 2024-01-26
Supplement: s1 [file s1 › Supplemental Table S1.pdf]

Supplementary Table S1 Supplemental information on wheat cultivar

| Cultivar    | Crop duration (Days) | Accession number                       | Yield ( $1 \times 10^3$ kg / ha) | Plant height (cm) | Source or release agency                                                                               |
|-------------|----------------------|----------------------------------------|----------------------------------|-------------------|--------------------------------------------------------------------------------------------------------|
| Shannong 22 | 228                  | Nationally Validated Wheat 2011013     | 7.55                             | 83                | Shandong Agricultural University                                                                       |
| Lunxuan 061 | 236                  | Hebei Province Validated Wheat 2009010 | 7.40                             | 75.2              | Institute of Crop Sciences, Chinese Academy of Agricultural Sciences; Xinjian Seed Farm in Zhao County |
| Nongda 5181 | 236                  | Nationally Validated Wheat 20170021    | 6.31                             | 86                | China Agricultural University                                                                          |
| Chang 6154  | 250                  | Nationally Validated Wheat 2003039     | 3.35                             | 90                | Shanxi Academy of Agricultural Sciences, Millet Research Institute                                     |
| Chang 4738  | 245                  | Nationally Validated Wheat 2006024     | 7.24                             | 80                | Shanxi Academy of Agricultural Sciences, Millet Research Institute                                     |
| Nongda 212  | 256                  | Hebei Province Validated Wheat 2013011 | 6.06                             | 80                | College of Agriculture and Biotechnology, China Agricultural University                                |
| Liaochun 18 | 256                  | Nationally Validated Wheat 2007024     | 5.61                             | 84                | College of Agriculture and Biotechnology, China Agricultural University                                |
| Jinuo 200   | 237                  | Hebei Province Validated Wheat 2011002 | 7.07                             | 74                | Institute of cereal and Oil Crop, Hebei Academy of Agriculture and Forestry Science                    |
| Henong 7106 | 241                  | Hebei Province Validated Wheat 2012006 | 6.42                             | 68.5              | Hebei Agricultural University                                                                          |
| Jimai 518   | 244                  | Hebei Province Validated Wheat 2013007 | 7.65                             | 75.5              | Institute of Cereal and Oil Crop, Hebei Academy of Agriculture and Forestry Science                    |
| Jimai 325   | 233                  | Nationally Validated Wheat 20210063    | 5.51                             | 70.7              | Institute of Cereal and Oil Crop, Hebei Academy of Agriculture and Forestry Science                    |
| Heng 136    | 245                  | Nationally Validated Wheat 2011017     | 5.37                             | 77                | Institute of Dryland Agriculture, Hebei Academy                                                        |

|             |     |                                                  |      |      |                                                                                                                               |
|-------------|-----|--------------------------------------------------|------|------|-------------------------------------------------------------------------------------------------------------------------------|
| Heng 6632   | 239 | Nationally Validated Wheat 2013018               | 5.26 | 73   | of Agriculture and Forestry Science<br>Institute of Dryland Agriculture, Hebei Academy<br>of Agriculture and Forestry Science |
| Cangmai 119 | 256 | Hebei Province Validated Wheat<br>2005012        | 7.03 | 74   | Cangzhou Academy of Agriculture and Forestry<br>Sciences                                                                      |
| Shannong 19 | 232 | Nationally Validated Wheat 2010005               | 8.39 | 86   | Shandong Agricultural University                                                                                              |
| Jimai 21    | 241 | Jiangsu Validated Wheat 200604                   | 7.74 | 76.9 | Crop Research Institute, Shandong Academy of<br>Agricultural Sciences                                                         |
| Jimai 22    | 223 | Nationally Validated Wheat 2006018               | 7.76 | 72   | Crop Research Institute, Shandong Academy of<br>Agricultural Sciences                                                         |
| Tanmai 98   | 237 | Shandong Province Crops Validation<br>2009057    | 7.94 | 82   | Tancheng County Seed Company, Shandong<br>Province                                                                            |
| Shimai 15   | 244 | Hebei Province Validated Wheat<br>2005003        | 8.33 | 77   | Shijiazhuang Academy of Agricultural and<br>Forestry Science                                                                  |
| Henong 826  | 242 | Hebei Province Validated Wheat<br>2007010        | 6.18 | 73.8 | Hebei Agricultural University                                                                                                 |
| H6756       | 236 | Shandong Province Crops Validation<br>[2004] 031 | 6.38 | 80   | Dezhou Academy of Agricultural Science;<br>Institute of Crop Sciences, Chinese Academy of<br>Agricultural Sciences            |
| Aikang 58   | 245 | Nationally Validated Wheat 2005008               | 7.99 | 70   | Wheat Breeding Center of Henan University of<br>Science and Technology                                                        |
| Jinan 17    | 240 | Shandong Province Variety Validation<br>0262-2   | 7.54 | 77   | Crop Research Institute; Shandong Academy of<br>Agricultural Sciences                                                         |
| Kunpeng 1   | 242 | Hebei Province Validated Wheat<br>2007006        | 7.30 | 73.5 | Hebei Kunpeng Seed Industry Co., Ltd                                                                                          |
| Lin 4       | 242 | Shandong Province Crops Validation               | 8.42 | 78.9 | Linyi Academy of Agricultural Sciences                                                                                        |

|                            |     |                                                             |      |      |                                                                                                                                 |
|----------------------------|-----|-------------------------------------------------------------|------|------|---------------------------------------------------------------------------------------------------------------------------------|
| Linmai 2                   | 241 | 2006046<br>Shandong Province Crops Validation<br>[2004] 021 | 7.65 | 78.6 | Linyi Academy of Agricultural Sciences                                                                                          |
| Nongda 399                 | 242 | Hebei Province Validated Wheat<br>2012004                   | 8.36 | 68.2 | College of Agriculture and Biotechnology, China<br>Agricultural University; Hebei Jincheng Seed<br>Industry Co., Ltd            |
| Lunxuan 103                | 242 | Hebei Province Validated Wheat<br>2015001                   | 8.80 | 68.6 | Institute of Crop Sciences, Chinese Academy of<br>Agricultural Sciences; Zhao County Agricultural<br>Science Research Institute |
| Kenong 1006                | 244 | Hebei Province Validated Wheat<br>2013003                   | 7.37 | 66.3 | Center for Agricultural Resources Research,<br>IGDB, CAS                                                                        |
| Jimai 19                   | 244 | Shandong Crops Province Validation<br>[2001] 002            | 7.63 | 82.9 | Crop Research Institute, Shandong Academy of<br>Agricultural Sciences                                                           |
| Han 5316                   | 242 | Nationally Validated Wheat 20000009                         | 6.34 | 85   | Handan Academy of Agricultural Sciences                                                                                         |
| Shunmai 1718               | 222 | Nationally Validated Wheat 2011009                          | 8.46 | 75   | Institute of Cotton Research, Shanxi Agricultural<br>University                                                                 |
| Yunhan 618                 | 230 | Nationally Validated Wheat 2010012                          | 5.57 | 90   | Institute of Cotton Research, Shanxi Agricultural<br>University                                                                 |
| Jimai 738 strong<br>gluten | 241 | Hebei Province Validated Wheat<br>2016015                   | 8.08 | 81.8 | Institute of cereal and Oil Crop, Hebei Academy<br>of Agriculture and Forestry Science                                          |
| Ke 2009 strong<br>gluten   | 240 | Nationally Validated Wheat 20170015                         | 8.95 | 81.5 | Center for Agricultural Resources Research,<br>IGDB, CAS                                                                        |
| Shiyou 20 strong<br>gluten | 223 | Nationally Validated Wheat 2011011                          | 6.30 | 77   | Shijiazhuang Academy of Agricultural and<br>Forestry Science                                                                    |
| Heng S29                   | 241 | Nationally Validated Wheat 2016025                          | 8.83 | 81   | Institute of Dryland Agriculture, Hebei Academy<br>of Agriculture and Forestry Science                                          |

|             |     |                                           |      |      |                                                                                                                                                                                                                                                                                                                   |
|-------------|-----|-------------------------------------------|------|------|-------------------------------------------------------------------------------------------------------------------------------------------------------------------------------------------------------------------------------------------------------------------------------------------------------------------|
| Kenong 2011 | 241 | LuYinZhong 2019178                        | 8.43 | 77.8 | Center for Agricultural Resources Research,<br>IGDB, CAS; Institute of Crop Sciences, Chinese<br>Academy of Agricultural Sciences<br>Shandong Agricultural University; Zibo Hefeng<br>Seed Industry Technology Co., Ltd<br>Institute of Cereal and Oil Crop, Hebei Academy<br>of Agriculture and Forestry Science |
| Shannong 28 | 226 | Nationally Validated Wheat 20230107       | 8.52 | 80.1 |                                                                                                                                                                                                                                                                                                                   |
| Jimai 120   | 237 | Hebei Province Validated Wheat<br>2016019 | 8.27 | 76.8 |                                                                                                                                                                                                                                                                                                                   |

---
