# Supplementary material for: Identification of Stem Rust Resistance Genes in Triticum Wheat Cultivars and Evaluation of Their Resistance to Puccinia graminis f. sp. tritici
Source: MDPI journal article supplement (doi:10.3390/agriculture14020198), 2024-01-26
Supplement: s1 [file s1 › Supplemental Table S2.pdf]

Supplemental Table S2 Weather conditions in Shenyang from 30 May to 30 June 2021 and 2022

| Date |      | High temperature (°C) |      | Low temperature (°C) |      | Weather                     |            | Wind direction         |                        |
|------|------|-----------------------|------|----------------------|------|-----------------------------|------------|------------------------|------------------------|
| 2021 | 2022 | 2021                  | 2022 | 2021                 | 2022 | 2021                        | 2022       | 2021                   | 2022                   |
| 5.30 | 5.30 | 20                    | 22   | 10                   | 11   | Cloudy                      | Clear      | Southwest wind force 3 | Northwest wind force 2 |
| 5.31 | 5.31 | 26                    | 25   | 10                   | 11   | Overcast                    | Cloudy     | South wind force 3     | South wind force 1     |
| 6.1  | 6.1  | 25                    | 29   | 15                   | 12   | Cloudy                      | Cloudy     | Southwest wind force 3 | South wind force 2     |
| 6.2  | 6.2  | 20                    | 28   | 13                   | 17   | Moderate rain to heavy rain | Cloudy     | South wind force 4     | Southeast wind force 2 |
| 6.3  | 6.3  | 23                    | 28   | 11                   | 18   | Clear                       | Cloudy     | Southwest wind force 3 | Southeast wind force 2 |
| 6.4  | 6.4  | 21                    | 20   | 14                   | 16   | Cloudy                      | Light rain | Southwest wind force 3 | South wind force 2     |
| 6.5  | 6.5  | 22                    | 24   | 10                   | 15   | Overcast                    | Light rain | West wind force 3      | South wind force 1     |
| 6.6  | 6.6  | 24                    | 21   | 13                   | 13   | Clear                       | Cloudy     | Northeast wind force 2 | North wind force 2     |
| 6.7  | 6.7  | 29                    | 20   | 14                   | 11   | Clear                       | Clear      | South wind force 2     | South wind force 1     |
| 6.8  | 6.8  | 30                    | 21   | 19                   | 14   | Overcast                    | Cloudy     | South wind force 3     | Northeast wind force 2 |
| 6.9  | 6.9  | 29                    | 23   | 19                   | 15   | Overcast                    | Cloudy     | Southwest wind force 3 | Southeast wind force 2 |
| 6.10 | 6.10 | 22                    | 24   | 18                   | 15   | Overcast                    | Overcast   | South wind force 2     | Southeast wind force 1 |
| 6.11 | 6.11 | 27                    | 25   | 18                   | 17   | Cloudy                      | Cloudy     | Southwest wind force 2 | Southeast wind force 1 |
| 6.12 | 6.12 | 30                    | 24   | 19                   | 17   | Clear                       | Light rain | Southwest wind force 4 | South wind force 3     |
| 6.13 | 6.13 | 22                    | 36   | 21                   | 20   | Cloudy                      | Clear      | Southwest wind force 3 | South wind force 4     |
| 6.14 | 6.14 | 28                    | 24   | 17                   | 15   | Cloudy                      | Cloudy     | South wind force 3     | Northeast wind force 1 |
| 6.15 | 6.15 | 27                    | 24   | 18                   | 15   | Clear                       | Cloudy     | South wind force 3     | South wind force 2     |
| 6.16 | 6.16 | 29                    | 27   | 18                   | 17   | Overcast                    | Cloudy     | Southwest wind force 3 | Southwest wind force 4 |
| 6.17 | 6.17 | 21                    | 29   | 14                   | 19   | Moderate rain               | Cloudy     | Southwest wind force 4 | Southwest wind force 2 |

|      |      |    |    |    |    |                             |                             |                        |                        |
|------|------|----|----|----|----|-----------------------------|-----------------------------|------------------------|------------------------|
| 6.18 | 6.18 | 27 | 26 | 14 | 18 | Cloudy                      | Cloudy                      | Southwest wind force 3 | South wind force 1     |
| 6.19 | 6.19 | 29 | 30 | 16 | 18 | Cloudy                      | Cloudy                      | Southwest wind force 3 | Northwest wind force 1 |
| 6.20 | 6.20 | 25 | 30 | 15 | 20 | Cloudy                      | Cloudy                      | West wind force 2      | South wind force 2     |
| 6.21 | 6.21 | 26 | 29 | 15 | 22 | Overcast                    | Overcast                    | North wind force 2     | South wind force 2     |
| 6.22 | 6.22 | 26 | 24 | 15 | 20 | Cloudy                      | Light rain to moderate rain | North wind force 2     | South wind force 1     |
| 6.23 | 6.23 | 29 | 25 | 16 | 19 | Overcast                    | Clear                       | Northeast wind force 2 | South wind force 1     |
| 6.24 | 6.24 | 29 | 26 | 18 | 18 | Cloudy                      | Overcast                    | South wind force 2     | West wind force 1      |
| 6.25 | 6.25 | 27 | 29 | 18 | 17 | Light rain to moderate rain | Light rain                  | South wind force 3     | Southwest wind force 4 |
| 6.26 | 6.26 | 23 | 28 | 19 | 20 | Light rain to moderate rain | Cloudy                      | South wind force 3     | East wind force 1      |
| 6.27 | 6.27 | 22 | 26 | 18 | 21 | Overcast                    | Overcast                    | Southeast wind force 3 | South wind force 1     |
| 6.28 | 6.28 | 25 | 26 | 19 | 20 | Light rain turns sunny      | Cloudy                      | South wind force 2     | Southwest wind force 1 |
| 6.29 | 6.29 | 28 | 27 | 19 | 22 | Clear                       | Overcast                    | South wind force 2     | South wind force 1     |
| 6.30 | 6.30 | 26 | 30 | 19 | 21 | Cloudy                      | Cloudy                      | South wind force 2     | Southeast wind force 1 |
